# Supplementary material for: Cyclic octapeptides containing thiazole. Effect of stereochemistry and degree of flexibility on calcium binding propertiesElectronic supplementary information (ESI) available: NOE and CD titration data for 5. See http://www.rsc.org/suppdata/p2/b1/b109168a/
Source: Royal Society of Chemistry journal article supplement (doi:10.1039/b109168a), 2002-02-11
Supplement: b109168a.doc [file b109168a.doc]

**Supplementary data**

Table S1 Observed inter-residue NOE correlations in d3-methanol at 298 K and related interproton distances for c(Thr-Gly(Thz)-Ile-Ser-Gly(Thz)-Ile)2 (**5**)

| Coupled Protons | Coupling strength (from NOE)a | Coupled Protons | Coupling strength (from NOE)a |
| --- | --- | --- | --- |
| NH(1)-NH(4) | Moderate | H18-H5 | Weak |
| NH(2)-NH(3) | Weak | H5-H11 | Strong |
| NH(2)-H7 | Moderate | H5-H7 | Strong |
| NH(2)-H8 | Moderate | H5-H14 | Weak |
| NH(2)-H11 | Weak | H22-H31 | Weak |
| NH(3)-H11 | Strong | H13a-H29a | Weak |
| NH(3)-H15 | Moderate | H29b-H5b | Moderate |
| NH(5)-H22 | Moderate | H31-H5b | Strong |
| NH(5)-H27 | Weak | H31-H24 | Strong |
| NH(5)-NH(6) | Weak | H30-H5b | Moderate |
| NH(6)-H27 | Strong | H25-H14 | Weak |
| NH(6)-H31 | Weak | H8-H15 | Weak |
| H3-H20 | Weak | H8-H30 | Weak |

a The intensities of NOE cross peaks were characterised as strong (1.8-2.7 Å), moderate (2.7-3.5 Å) and weak (3.5-5.0 Å).

b a and b refer to the two diasteriotopic -protons.

Figure S1 CD titration of an acetonitrile solution containing **5** (0.2763 mM) with added (from bottom to top) 0, 0.031, 0.062, 0.092, 0.123, 0.154, 0.185, 0.246, 0.308, 0.370, 0.431, 0.493, 0.554, 0.616, 0.677, 0.739, 0.801, 0.862, 0.924, 0.985, 1.047, 1.109, 1.170, 1.232, 1.324, 1.417, 1.540, 1.694, 1.848 equivalents of calcium perchlorate (0.0166 M).
